# Supplementary material for: 3′-Aminothiocyclohexanespiro-5′-hydantoin and Its Pt(II) Complex—Synthesis, Cytotoxicity and Xanthine Oxidase Inhibitory Activity
Source: MDPI journal article supplement (doi:10.3390/inorganics10100175), 2022-10-20

## Supplementary materials

Manuscript ID: inorganics-1882113

Title: 3'-Aminothiocylohexanespiro-5'-Hydantoin and its Pt(II) Complex – Synthesis, Cytotoxicity and Xanthine Oxidase Inhibitory Activity

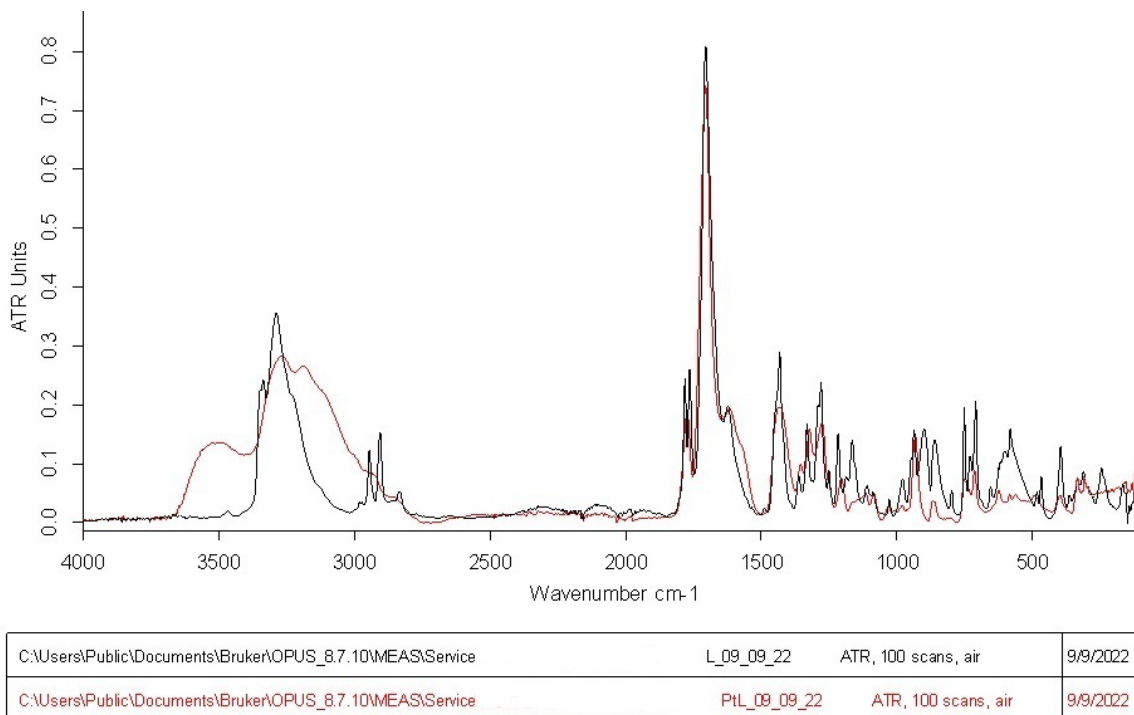

**Figure S1.** Experimental IR spectra of the ligand **1** (black) and complex **2** (red) in the range 4000-100 cm<sup>-1</sup>.

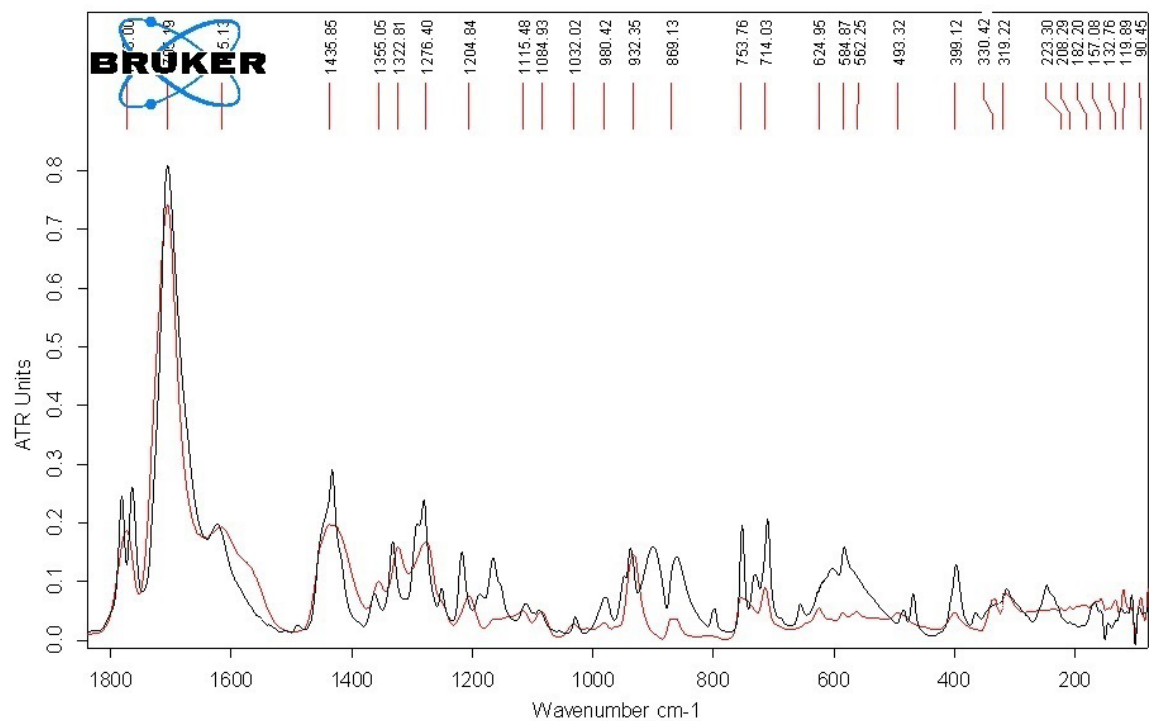

|                                                           |              |                     |          |
|-----------------------------------------------------------|--------------|---------------------|----------|
| C:\Users\Public\Documents\Bruker\OPUS_8.7.10\MEAS\Service | L_09_09_22   | ATR, 100 scans, air | 9/9/2022 |
| C:\Users\Public\Documents\Bruker\OPUS_8.7.10\MEAS\Service | PtL_09_09_22 | ATR, 100 scans, air | 9/9/2022 |

Page 1/1

**Figure S2.** Experimental IR spectra of the ligand **1**(black) and complex **2**(red) in the range 1800-100  $\text{cm}^{-1}$ .

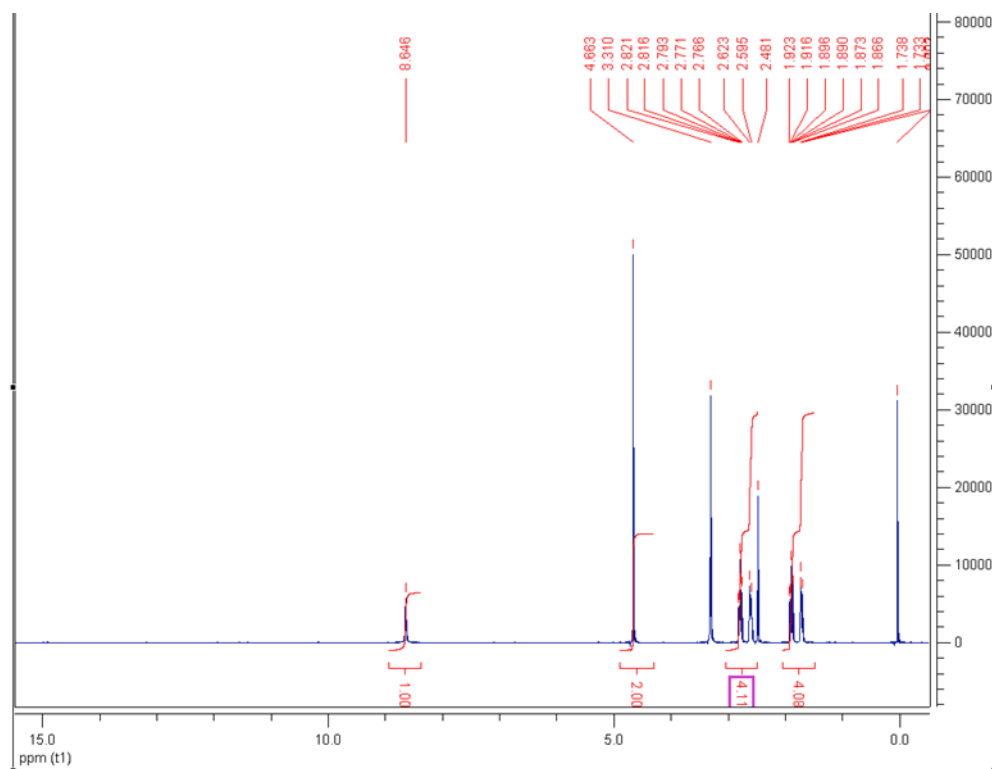

**Figure S3.**  $^1\text{H}$  NMR spectrum of the ligand **1**.

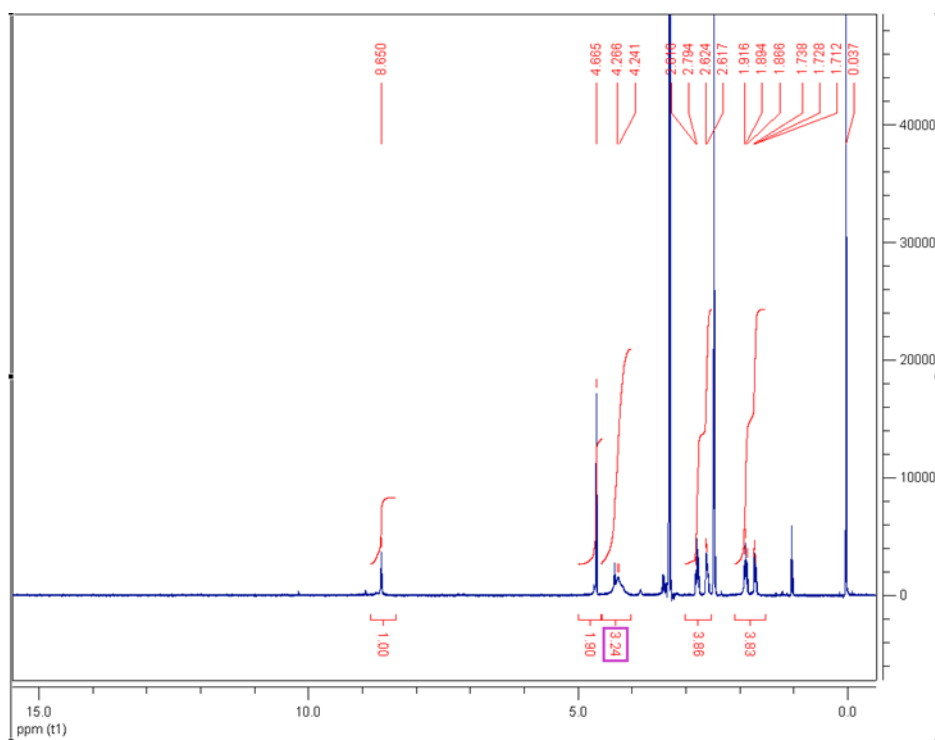

**Figure S4.**  $^1\text{H}$  NMR spectrum of complex **2**.

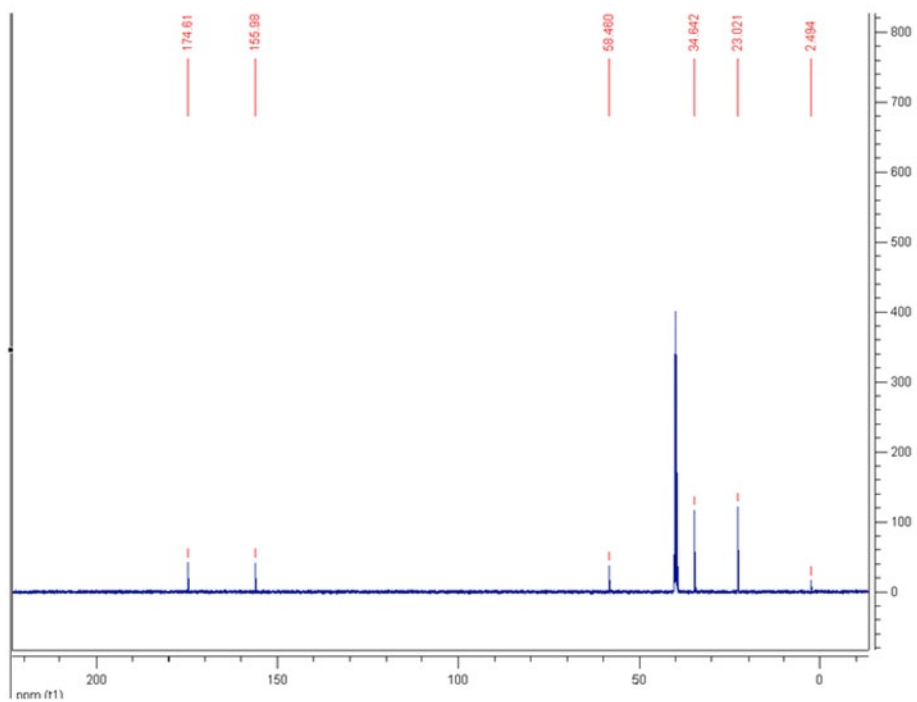

**Figure S5.** <sup>13</sup>C NMR spectrum of ligand 1.

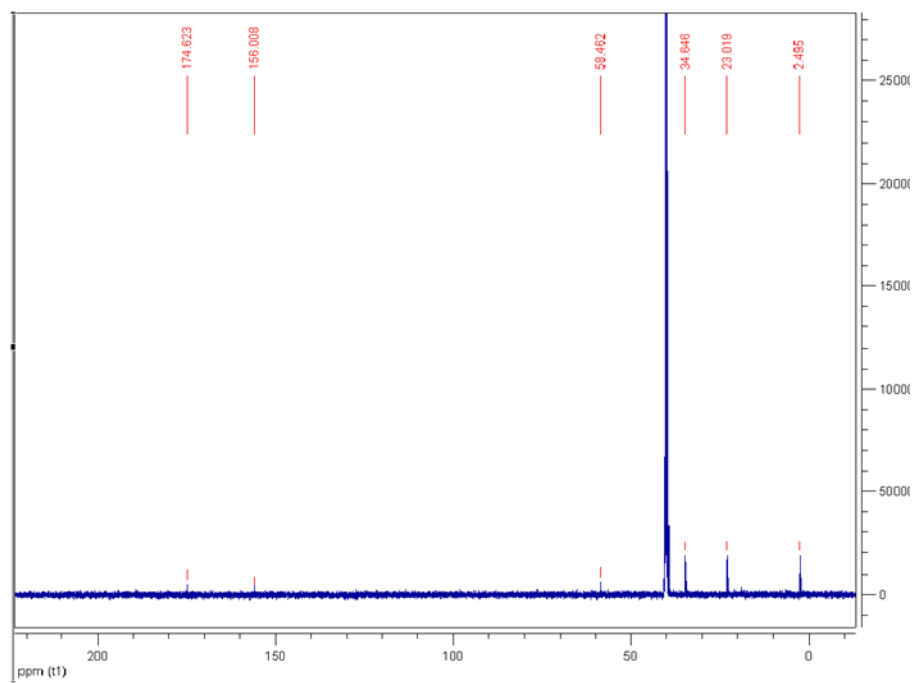

**Figure S6.** <sup>13</sup>C NMR spectrum of complex 2.

## Cis-isomer

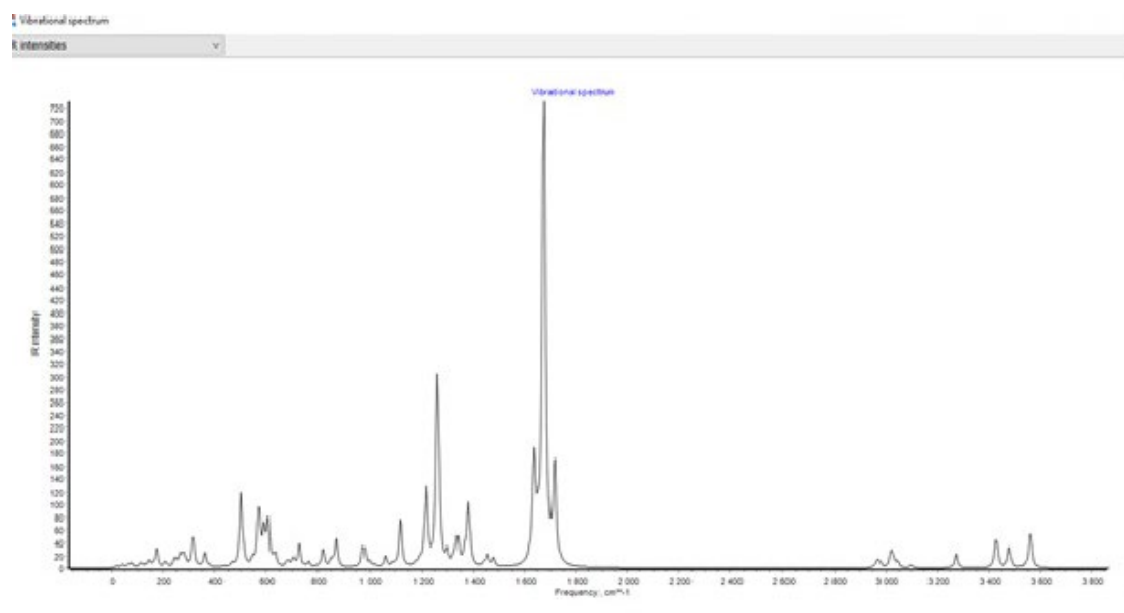

**Figure S7.** Theoretical IR spectra of the *cis*- and *trans*-isomers of the complex 2.

## Trans-isomer

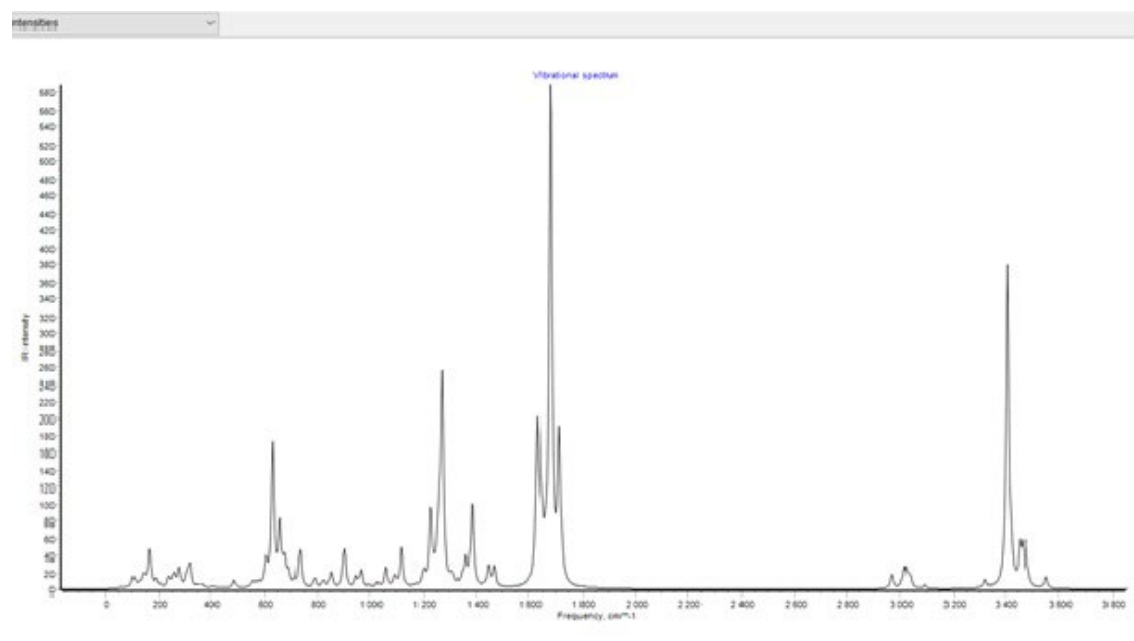

Supplement: s1 [file s1]
